# Supplementary material for: Dual hindlimb control elements in theTbx4gene and region-specific control of bone size in vertebrate limbs
Source: Oxford University Press journal article supplement (doi:10.1242/dev.017384), 2008-06-26
Supplement: dev017384-sup-017384-figs4.pdf [file dev017384-sup-017384-figs4.pdf]

Pitx1

Mouse GCTAATTAAGCCTA--TACCACAAGCGAATGTGA--GGCTAATAAGGCGGCCCAATTCAGGGTCCCT--CCACACCAAGC--CAGCCGGCTGCCTGTTTATTGCCCGTATGGAGA 110
Kangaroo Rat GCTAATTAAGCCTA--TACCATGAGTGAATGTGG--GGCTAATAAGGCGGCCCAATTCAGGGTCCCT--CTCCACCAAGC--CAGCCGGCTGCCTGTTTATTGCCCGTATGGAGA 110
Guinea Pig GCTAATTAAGCCTC--TACCATGAGTGAATGTGA--GGCTAATAAGGCGGCCCAATTCAGGGTCCCT--CCACACCAAGC--CAGCCGGCTGCCTGTTTATTGCCCGTATGGAGA 110
Rabbit GCTAATTAAGCCTC--TACCACAGTGAATGTGA--GGCTAATAAGGCGGCCCAATTCAGGGTCCCT--CCACACCAAGC--CAGCCGGCTGCCTGTTTATTGCCCGTATGGAGA 110
Pika GCTAATTAAGCCTC--TACCACAGTGAATGTGA--GGCTAATAAGGCGGCCCAATTCAGGGTCCCT--CCACACCAAGC--CAGCCGGCTGCCTGTTTATTGCCCGTATGGAGA 110
Human CCTAATTAAGCCTC--TACCACAGTGAATGTGA--GGCTAATAAGGCGGCCCAATTCAGGGTCCCT--CCACACCAAGC--CAGCCGGCTGCCTGTTTATTGCCCGTATGGAGA 110
Macaque CCTAATTAAGCCTC--TACCACAGTGAATGTGA--GGCTAATAAGGCGGCCCAATTCAGGGTCCCT--CCACACCAAGC--CAGCCGGCTGCCTGTTTATTGCCCGTATGGAGA 110
Tarsier CCTAATTAAGCCTC--TACCACAGTGAATGTGA--GGCTAATAAGGCGGCCCAATTCAGGGTCCCT--CCACACCAAGC--CAGCCGGCTGCCTGTTTATTGCCCGTATGGAGA 110
European Hedgehog ACTAATTAAGCCTC--TACCACAGTGAATGTGA--GGCTAATAAGGCGGCCCAATTCAGGGTCCCT--CCACACCAAGC--CAGCCGGCTGCCTGTTTATTGCCCGTATGGAGA 110
Eurasian Shrew ACTAATTAAGCCTC--TACCACAGTGAATGTGA--GGCTAATAAGGCGGCCCAATTCAGGGTCCCT--CCACACCAAGC--CAGCCGGCTGCCTGTTTATTGCCCGTATGGAGA 110
Dog GCTAATTAAGCCTC--TACCACAGTGAATGTGA--GGCTAATAAGGCGGCCCAATTCAGGGTCCCT--CCACACCAAGC--CAGCCGGCTGCCTGTTTATTGCCCGTATGGAGA 110
Cat GCTAATTAAGCCTC--TACCACAGTGAATGTGA--GGCTAATAAGGCGGCCCAATTCAGGGTCCCT--CCACACCAAGC--CAGCCGGCTGCCTGTTTATTGCCCGTATGGAGA 110
Flying Fox GCTAATTAAGCCTC--TACCACAGTGAATGTGA--GGCTAATAAGGCGGCCCAATTCAGGGTCCCT--CCACACCAAGC--CAGCCGGCTGCCTGTTTATTGCCCGTATGGAGA 110
Horse GCTAATTAAGCCTC--TACCACAGTGAATGTGA--GGCTAATAAGGCGGCCCAATTCAGGGTCCCT--CCACACCAAGC--CAGCCGGCTGCCTGTTTATTGCCCGTATGGAGA 110
Cow GCTAATTAAGCCTC--TACCACAGTGAATGTGA--GGCTAATAAGGCGGCCCAATTCAGGGTCCCT--CCACACCAAGC--CAGCCGGCTGCCTGTTTATTGCCCGTATGGAGA 110
Armadillo GCTAATTAAGCCTC--TACCACAGTGAATGTGA--GGCTAATAAGGCGGCCCAATTCAGGGTCCCT--CCACACCAAGC--CAGCCGGCTGCCTGTTTATTGCCCGTATGGAGA 110
Elephant ACTAATTAAGCCTC--TACCACAGTGAATGTGA--GGCTAATAAGGCGGCCCAATTCAGGGTCCCT--CCACACCAAGC--CAGCCGGCTGCCTGTTTATTGCCCGTATGGAGA 110
Hyrax GCTAATTAAGCCTC--TACCACAGTGAATGTGA--GGCTAATAAGGCGGCCCAATTCAGGGTCCCT--CCACACCAAGC--CAGCCGGCTGCCTGTTTATTGCCCGTATGGAGA 110
Opossum AATAATTAAGCCTC--TACCACAGTGAATGTGA--GGCTAATAAGGCGGCCCAATTCAGGGTCCCT--CCACACCAAGC--CAGCCGGCTGCCTGTTTATTGCCCGTATGGAGA 110
Platypus GCTAATTAAGCCTC--TACCACAGTGAATGTGA--GGCTAATAAGGCGGCCCAATTCAGGGTCCCT--CCACACCAAGC--CAGCCGGCTGCCTGTTTATTGCCCGTATGGAGA 110
\* \* \* \* \*

Mouse TCATTAATGCTCCTGACACCGGGTCACTCCGGGTCATCCGAGGCGCTGTCGCAAGACAAGGGGAAATGAACTTCCAGC--ACATGTGCCAGGCGTGAAC--GGA--- 220
Kangaroo Rat TCATTAATGCTCCTGACACCGGGTCACTCCGGGTCATCCGAGGCGGCTGCAAAAACA--GGGAAATGAACTTCCAGC--ACATGTGCCAGGCTGAGC---GGA--- 221
Guinea Pig TCATTAATGCTCCTGACACCGGGTCACTCCGGGTCATCCGAGGCGGCTGCAAAAACAAGGGGAAATGAACTTCCAGC--ACATGTGCCAGGCTGAGC---GGA--- 222
Rabbit TCATTAATGCTCCTGACACCGGGTCACTCCGGGTCATCCGAGGCGGCTGCAAAAACAAGGGGAAATGAACTTCCAGC--ACATGTGCCAGGCTGAGC---GGA--- 221
Pika TCATTAATGCTCCTGACACCGGGTCACTCCGGGTCATCCGAGGCGGCTGCAAAAACAAGGGGAAATGAACTTCCAGC--ACATGTGCCAGGCTGAGC---GGA--- 221
Human TCATTAATGCTCCTGACACCGGGTCACTCCGGGTCATCCGAGGCGGCTGCAAAAACAAGGGGAAATGAACTTCCAGC--ACATGTGCCAGGCTGAGC---GGA--- 221
Macaque TCATTAATGCTCCTGACACCGGGTCACTCCGGGTCATCCGAGGCGGCTGCAAAAACAAGGGGAAATGAACTTCCAGC--ACATGTGCCAGGCTGAGC---GGA--- 221
Tarsier TCATTAATGCTCCTGACACCGGGTCACTCCGGGTCATCCGAGGCGGCTGCAAAAACAAGGGGAAATGAACTTCCAGC--ACATGTGCCAGGCTGAGC---GGA--- 221
European Hedgehog TCATTAATGCTCCTGACACCGGGTCACTCCGGGTCATCCGAGGCGGCTGCAAAAACAAGGGGAAATGAACTTCCAGC--ACATGTGCCAGGCTGAGC---GGA--- 221
Eurasian Shrew TCATTAATGCTCCTGACACCGGGTCACTCCGGGTCATCCGAGGCGGCTGCAAAAACAAGGGGAAATGAACTTCCAGC--ACATGTGCCAGGCTGAGC---GGA--- 221
Dog TCATTAATGCTCCTGACACCGGGTCACTCCGGGTCATCCGAGGCGGCTGCAAAAACAAGGGGAAATGAACTTCCAGC--ACATGTGCCAGGCTGAGC---GGA--- 221
Cat TCATTAATGCTCCTGACACCGGGTCACTCCGGGTCATCCGAGGCGGCTGCAAAAACAAGGGGAAATGAACTTCCAGC--ACATGTGCCAGGCTGAGC---GGA--- 221
Flying Fox TCATTAATGCTCCTGACACCGGGTCACTCCGGGTCATCCGAGGCGGCTGCAAAAACAAGGGGAAATGAACTTCCAGC--ACATGTGCCAGGCTGAGC---GGA--- 221
Horse TCATTAATGCTCCTGACACCGGGTCACTCCGGGTCATCCGAGGCGGCTGCAAAAACAAGGGGAAATGAACTTCCAGC--ACATGTGCCAGGCTGAGC---GGA--- 221
Cow TCATTAATGCTCCTGACACCGGGTCACTCCGGGTCATCCGAGGCGGCTGCAAAAACAAGGGGAAATGAACTTCCAGC--ACATGTGCCAGGCTGAGC---GGA--- 221
Armadillo TCATTAATGCTCCTGACACCGGGTCACTCCGGGTCATCCGAGGCGGCTGCAAAAACAAGGGGAAATGAACTTCCAGC--ACATGTGCCAGGCTGAGC---GGA--- 222
Elephant TCATTAATGCTCCTGACACCGGGTCACTCCGGGTCATCCGAGGCGGCTGCAAAAACAAGGGGAAATGAACTTCCAGC--ACATGTGCCAGGCTGAGC---GGA--- 225
Hyrax TCATTAATGCTCCTGACACCGGGTCACTCCGGGTCATCCGAGGCGGCTGCAAAAACAAGGGGAAATGAACTTCCAGC--ACATGTGCCAGGCTGAGC---GGA--- 223
Opossum TCATTAATGCTCCTGACACCGGGTCACTCCGGGTCATCCGAGGCGGCTGCAAAAACAAGGGGAAATGAACTTCCAGC--ACATGTGCCAGGCTGAGC---GGA--- 235
Platypus TCATTAATGCTCCTGACACCGGGTCACTCCGGGTCATCCGAGGCGGCTGCAAAAACAAGGGGAAATGAACTTCCAGC--ACATGTGCCAGGCTGAGC---GGA--- 215
\* \* \* \* \*

Mouse GGGTGGG--GGTTCAG--TCACCCCACTCTAGAAGT--GATC--TGCACTCCACCC-----CCAGTCAGTGAAGACCTCTCTTCCT-----CTCAAGAGCGG----- 315
Kangaroo Rat GGGGACTCCGATCACCC--ACACTTTAGCCTGGGAGA--GATC--AGCACCTCCAGCAGTCAGGACCCCTGAAACAACCTCCCTGCCCATTCGTGTCTGAGAGGGAGGG----- 330
Guinea Pig GGGGATTTGTCGACACCC--ACACTTCAGCTCTGGGAGA--GATC--CAGCAGC-----CAAGCGATCAGATCCCC-----AAACAATCCC----- 302
Rabbit GGGGACTCCGTTACCC--ACACTCAGCTCTGGGAGA--GATC--AGACAC-----CAAGCGATCAGACCCCC-----AAACAATCCC----- 300
Pika GGGGACTCCGTTACCC--ACACTCAGCTCTGGGAGA--GATC--AGCACC-----CAAGCGATCAGACCCCC-----AAACAATCCC----- 311
Human GGGGACTCCGTTACCC--ACACTCAGCTCTGGGAGA--GATC--AGCACC-----CAAGCGATCAGACCCCC-----AAACAATCCC----- 299
Macaque GGGGACTCCGTTACCC--ACACTCAGCTCTGGGAGA--GATC--AGCACC-----CAAGCGATCAGACCCCC-----AAACAATCCC----- 299
Tarsier GGGGACTCCGTTACCC--ACACTCAGCTCTGGGAGA--GATC--AGCACC-----CAAGCGATCAGACCCCC-----AAACAATCCC----- 299
European Hedgehog GGGGTTCTGTCACCC--ACACTCAGCTCTGGGAGA--GATC--AGCACC-----CAAGCGATCAGACCCCC-----AAACAATCCC----- 299
Eurasian Shrew GGGGTTCTGTCACCC--ACACTCAGCTCTGGGAGA--GATC--AGCACC-----CAAGCGATCAGACCCCC-----AAACAATCCC----- 299
Dog GGGGACTCCGTTACCC--ACACTCAGCTCTGGGAGA--GATC--AGCACC-----CAAGCGATCAGACCCCC-----AAACAATCCC----- 301
Cat GGGGACTCCGTTACCC--ACACTCAGCTCTGGGAGA--GATC--AGCACC-----CAAGCGATCAGACCCCC-----AAACAATCCC----- 299
Flying Fox GGGGACTCCGTTACCC--ACACTCAGCTCTGGGAGA--GATC--AGCACC-----CAAGCGATCAGACCCCC-----AAACAATCCC----- 296
Horse GGGGACTCCGTTACCC--ACACTCAGCTCTGGGAGA--GATC--AGCACC-----CAAGCGATCAGACCCCC-----AAACAATCCC----- 299
Cow GGGGACTCCGTTACCC--ACACTCAGCTCTGGGAGA--GATC--AGCACC-----CAAGCGATCAGACCCCC-----AAACAATCCC----- 299
Armadillo GGGGACTCCGTTACCC--ACACTCAGCTCTGGGAGA--GATC--AGCACC-----CAAGCGATCAGACCCCC-----AAACAATCCC----- 287
Elephant GGGGTTCTGTCACCC--ACACTCAGCTCTGGGAGA--GATC--AGCACC-----CAAGCGATCAGACCCCC-----AAACAATCCC-----C 305
Hyrax GGGGTTCTGTCACCC--ACACTCAGCTCTGGGAGA--GATC--AGCACC-----CAAGCGATCAGACCCCC-----AAACAATCCC-----C 303
Opossum GGGCAAGTCAGACTCTGCCCCACCCCTGAGAATGATC--CTCCCTAATAC--CAAATGGCAGACCCCC-----AAGAATCG----- 319
Platypus -----ACCACAATGGCTCTGAGCTGGGACAC--AAACA--ATGCCC-----CAAATGAGCCCCATCAG-----GGACAGCTGGA----- 283
\* \* \* \* \*

Mouse CCTGCTCCATA--CTGCTGAAG--AAGGA-----AGTCTATGGAAGGCG--GAAA-----TGGCGACCCCTGTCTGG--CCGGG--A-----CAACCCCCACTGA 398
Kangaroo Rat GAGGGGGGAT--GGGCAAGGAAGGGCGAGGA--ATCTCGGGAAGGCG--GAAA-----TGGAGGCCCTGTCTGACAGCAG--A-----CAACCCCCACTGA 418
Guinea Pig CCTGCCCATG--CTGCTCTAAGG--AGGGA-----GTCTCGGGGACAGT--GAAG-----TGGAGGCCCTGTCTGAGCAG--A-----CAACCCCCACTGA 386
Rabbit CTCCGCACAG--CTGCACTGGGAG--GAGGG-----GTCTCGGGGAGGCGAAG--GAAG-----TGGAGGCCCTGTCTGAGCAG--A-----CAACCCCCACTGA 408
Pika TTCTCGAAGCAACTGAGCTCCGGAG--GAGGG-----GTCTCGGGGAGGCGATGAAAGAGA--TGGAGGCTGTCTGAGCAG--A-----CAACCCCCACTGA 387
Human TTCTGCCATG--CTGCACTCAGGGG--GATG-----GTCTCGGGGAGGCG--GAGG-----TGGAGGCCCTGTCTGAGCAG--A-----CAACCCCCACTGA 384
Macaque TTCTGCCATG--CTGCACTCAGGGG--GATG-----GTCTCGGGTAAAGGCG--GAGG-----TGGAGGCCCTGTCTGAGCAG--A-----CAACCCCCACTGA 384
Tarsier CTCTGCCATG--CTGCACTCAGGGG--GATG-----GTCTCGGGGAGGCG--AAAG-----TGGAGGCCCTGTCTGAGCAG--A-----CAACCCCCACTGA 384
European Hedgehog -TCTGTCCAGG--TGGACTCAGGGGTTGAGG--GATG-----GTCTCGGGGAGGCG--GAGG-----GAGGAGCCCTCATCTGAGCAG--A-----CAACCCCCACTGA 387
Eurasian Shrew CCTGTCCCAAG--CTGTGCGCGGAGGT--GGTGGGA-----GTCTCGGGGAGGCG--GCCGG-----GGAGGAGCCCTC--CGGCGCCGGG-----AAACCCCCACTGA 389
Dog CTCTGCCAAG--CTGCACTCAGGGG--GATG-----GTCTCGGGGAGGCGT--GAAG-----GGAGGAGCCCTCATCTGAGCAG--A-----CAACCCCCACTGA 384
Cat CTCTGCCAAG--CTGCACTCAGGGG--GATG-----GTCTCGGGGAGGCGT--GAAG-----GGAGGAGCCCTCATCTGAGCAG--A-----CAACCCCCACTGA 382
Flying Fox CCTGTCCCAAG--CTGCACTCAGGGG--GATG-----GTCTCGGGGAGGCG--AAAG-----GTAGGAGCCCTGTCTGAGCAG--A-----CAACCCCCACTGA 381
Horse CCTGTCCCAAG--CTGCACTCAGGGG--AATG-----GTCTCGGGGAGGCG--GAGG-----GGAGGAGCCCTGTCTGAGCAG--A-----CAACCCCCACTGA 384
Cow TTCTGCCAAG--TGTGCGCTTGAAG--GATG-----GTCTCGGGGAGGCG--AAAG-----GGAGGAGCCCTGTCTGAGCAG--A-----CAACCCCCACTGA 384
Armadillo CCTGTCTCTAG--CTGCACTCAGGGGCTGAGGGTGGGGT--GTCTCGGGGAGGCG--GAGG-----TGTAGTCTCATCTGAGCAG--A-----CAACCCCCACTGA 383
Elephant TCCACACTAG--CGGAGCTTGGGAGGGGTA-----ATCTCGGGGAGGCG--GAGG-----TGGAGGAGCCCTGTCTGAGCAG--A-----CAACCCCCACTGA 393
Hyrax TACACACTA--CGGAGCTTGGGAGGGGTA-----GTCTCGGGGAGGCG--GAGG-----TGTAGTCTCATCTGAGCAG--A-----CAACCCCCACTGA 391
Opossum ---ATTCTT---TGGGAGATGTGT--AGCT-----CTGTGAGGAGAAATAAAGG-----GGAGGCTCTGTCTT--CTGA-----TCCACTCA 395
Platypus CCTCTCCAT-----TGTAGCGGGAGCTGAGGGG-----GCTCCAGAGGGAGCTGAGGATCATTC--TCATCCCAAGGCAAGACTGGGGATCCGGCTACCCCTGGCA 388
\* \* \* \* \*

Pitx1

Mouse GGCTGTCCCCACCAACAGC-----GGGCAATAATCCCTGGGAGC-----GGCTGGGGTGGCTGTGGAGTGTGACGTGCACTGCT-----ACAGGGGCCAG--ACTACC--AGCCGC 500
Kangaroo Rat GGCTGTCCCAACCAACAGC-----GGGCAATAATCCCTGGGAGC-----GGCTGGGGTGGCTGTGGAGTGTGACGTGCACTGCT-----ACAGGGGCCAG--ACTACC--AGCCGC 520
Guinea Pig GGCTGTCCCAACCAACAGC-----GGGCAATAATCCCTGGGAGC-----GGGCAAGTGTGTGTGGAGTGTGACGTGCACTGCT-----ACAGGGGCCAG--ACTACC--AGCCGC 488
Rabbit GGCTGTCCCAACCAACAGC-----GGGCAATAATCCCTGGGAGC-----GGCTGGAGTGTGTGTGGAGTGTGACGTGCACTGCT-----ACAGGGGCCAG--ACTACC--AGCCGC 490
Pika GGCTGTCCCAACCAACAGC-----GGGCAATAATCCCTGGGAGC-----GGCTGGGGTGTGTGTGGAGTGTGACGTGCACTGCT-----ACAGGGGCCAG--ACTACC--AGCCGC 510
Human GGCTGTCCCAACCAACAGC-----GGGCAATAATCCCTGGGAGC-----GGACTGGGTGTGTGTGGAGTGTGACGTGCACTGCT-----ACAGGGGCCAG--ACTACC--AGCCGC 486
Macaque GGCTGTCCCAACCAACAGC-----GGGCAATAATCCCTGGGAGC-----GGACTGGGTGTGTGTGGAGTGTGACGTGCACTGCT-----ACAGGGGCCAG--ACTACC--AGCCGC 486
Tarsier GGCTGTCCCAACCAACAGC-----GGGCAATAATCCCTGGGAGC-----GGACTGGGTGTGTGTGGAGTGTGACGTGCACTGCT-----ACAGGGGCCAG--ACTACC--AGCCGC 486
European Hedgehog GGCTGTCCCAACCAACAGC-----GGGCAATAATCCCTGGGAGC-----GGCTGGGGTGTGTGTGGAGTGTGACGTGCACTGCT-----ACAGGGGCCAG--ACTACC--AGCCGC 495
Eurasian Shrew GGCTGTCCCAACCAACAGC-----GGGCAATAATCCCTGGGAGC-----GGCTGGGGTGTGTGTGGAGTGTGACGTGCACTGCT-----ACAGGGGCCAG--ACTACC--AGCCGC 494
Dog GGCTGTCCCAACCAACAGC-----GGGCAATAATCCCTGGGAGC-----GGCTGGGGTGTGTGTGGAGTGTGACGTGCACTGCT-----ACAGGGGCCAG--ACTACC--AGCCGC 485
Cat GGCTGTCCCAACCAACAGC-----GGGCAATAATCCCTGGGAGC-----GGCTGGGGTGTGTGTGGAGTGTGACGTGCACTGCT-----ACAGGGGCCAG--ACTACC--AGCCGC 483
Flying Fox GGCTGTCCCAACCAACAGC-----GGGCAATAATCCCTGGGAGC-----GGCTGGGGTGTGTGTGGAGTGTGACGTGCACTGCT-----ACAGGGGCCAG--ACTACC--AGCCGC 478
Horse GGCTGTCCCAACCAACAGC-----GGGCAATAATCCCTGGGAGC-----GGCTGGGGTGTGTGTGGAGTGTGACGTGCACTGCT-----ACAGGGGCCAG--ACTACC--AGCCGC 485
Cow GGCTGTCCCAACCAACAGC-----GGGCAATAATCCCTGGGAGC-----GGGCAAGGGTGTGTGTGGAGTGTGACGTGCACTGCT-----ACAGGGGCCAG--ACTACC--AGCCGC 489
Armadillo GGCTGTCCCAACCAACAGC-----GGGCAATAATCCCTGGGAGC-----GGCTGGGGTGTGTGTGGAGTGTGACGTGCACTGCT-----ACAGGGGCCAG--ACTACC--AGCCGC 485
Elephant GGCTGTCCCAACCAACAGC-----GGGCAATAATCCCTGGGAGC-----GGCTGGGGTGTGTGTGGAGTGTGACGTGCACTGCT-----ACAGGGGCCAG--ACTACC--AGCCGC 495
Hyrax GGCTGTCCCAACCAACAGC-----GGGCAATAATCCCTGGGAGC-----GGCTGGGGTGTGTGTGGAGTGTGACGTGCACTGCT-----ACAGGGGCCAG--ACTACC--AGCCGC 493
Opossum GAGGCTCCCACTGATAGACT-----AACATAATCCCTGGGAGC-----TGGCTGGGGTGTGTGTGGAGTGTGACGTGCACTGCT-----CCAGGAGCAAGGCGCCCTCTACT 500
Platypus GGACTCCCGCCGAAAGGAA-----GGGAGCTAATCCCTGGGAGC--AAGCGCTGGGGTGTGTGTGGAGTGTGACGTGCACTGCT-----TTCAGGAGCCAGCCCTCGGCTCT 503
\* \* \* \* \*

Mouse AGGT---GGCGGGAAGACAC----GGGCT-----GA-GGCCACGTG9GT-GCGCATGCTGGGCTCCG-CTCCACCCTGCT-CTGCC-----TTTTTTTTTATCAGT--- 587  
 Kangaroo Rat AGGT---GGCGGGAAGGCAC----TGGCCC-----GGCCACCACTG9T---CACATGCTCTGGGCTTAG-CCCACCCCTTCTCCAGT-----TTCCTCTCTGTGAT--- 607  
 Guinea Pig AGGT---GGCGGGAAGGCAC----TGGCCT-----GGTGCACCTG9T---TTCCGGCGAGCCT-AG-CCCTTTC-----CAATC-----AGTGAITTTGGGCTCT--- 568  
 Rabbit AGGT---GGCGGGAAGGCAC----AGGCCC-----GGCGCCACTG9G---CACACAGCAGGCTCTCAG-CCCGGCTCTCCAGCCT---TCTTAGTCACTGAT--- 577  
 Pika AGGT---GGCGGGAAGGCAT---GAGCCA-AGC-----CCTTGG-CCCTGCCCTCACCCTG---CCTAGT9G9C-ATT--- 572  
 Human AGGT---GGCGGGAAGGCAC----AGGCT-----GTTGGCACCTG9G---CGCGAGCTTGGGCTTGG-CCCCACCTCACCCTG---TCCCTCTGTGTGAT--- 573  
 Macaque AGGT---GGCGGGAAGGCAC----AGGCT-----GTTGGCACCTG9G---CGCGAGCTTGGGCTTGG-CCCCACCTCACCCTG---TCCCTCTGTGTGAT--- 573  
 Tarsier AGGT---GGCGGGAAGGCAC----AG-CCC-----GGCGCCCACTG9G---CGCGAGCTTGGGCTTGG-CCCCACCCCAAC-----TGGGTGAT--- 561  
 European Hedgehog AGGT---GGCGGGAAGGCAC----AGACT-----GAGCACCCCGG---GCAACC-AGCTTGG-CCCCACCTTCCCGGCT---TGCCTCTGTGTGAT--- 576  
 Eurasian Shrew AGGT---GGCGGGAAGGCAC----CA-----CAGCATCTG9G---CGCGAA-ATGGGCTTCCA-CCCCACCACTGAGCC-CCCTCTCTCCGTGAT--- 573  
 Dog AGGT---GGCGGGAAGGCAC----AGTGC-----G-CGCGCACCTG9G---CTGAGCGCGGCTCA-CCCAACCTTCCACCCTA-----TCCCGGAGCTGAT--- 569  
 Cat AGGT---GGCGGGAAGGCAC----AGTGC-----GCGCGCACCTG9G---CATTAGCGCGGCTCT-CCCAACCTTCCACCCTA-----TTCOCOCGCGCATCC- 568  
 Flying Fox AGGT---GGCGGGAAGGCCT---GGGCCA-----AGGGCGCACTG9G---CTGAGCGCGGCTTGG-CCCAACCTTCCACCCTA-----TCCCGGAGCTGAT--- 565  
 Horse AGGT---GGCGGGAAGGCAC----AGGCC-----GGCGCCCACTG9G---CGCGAAGCTGGGACTTGGCCCCCGGCTTCCAGCTCT---TCCCTCTGTGTGAT--- 573  
 Cow AGGT---GGCGGGAAGGCAC----AGGCC-----G-CGCGCACCTG9G---CAGCAGCTGACAGCCCG-CCCAACTCC-CCGCT---TCCACCGCATGAT--- 573  
 Armadillo AGGT---GGCGGGAAGGCAC----AGGCC-----C-CGCGTCACTG9G---CGCGAGCTGGGCTTGG-CCCAAGCCCTG-CCGCT---TCCCTCTGTGTGAT--- 571  
 Elephant AGGT---GGCGGGAAGGCAC----AGGCC-----GGCAGCCACTG9G---CGTGAAGCCCGGCGCTTAA-CCCCGCTTAA-CCACT---TCCCGTCTCCAGAT--- 583  
 Hyrax AGGT---GGCGGGAAGGCAC----GGGCC-----GGCAGCCACTG9G---CGGAGCCCGGAGCCTTGAACCCCGCCG---CCGCG---TCCCTCTCCCGCCG--- 577  
 Opossum AGGT---GTTGAGGAGGGG---CGAAG-----AGGGCTGAGTGGG---CATGTGGCTTCTCTCTGTTCCTTCCCTTCTCTCT---TCTCTGTCTCCCTTCT--- 591  
 Platypus GTACTTGGCAGGAATCACCA-CAGGCTCTGG---GTGGTGGTGGTGGAGAGGATCAGAATCATTTACTTCCCTTCTCTCTCCCCAGACGACA-TCATTTGGGATGTTTGGT 618

**Pitx1**

Mouse --GA-----TT----GGC-TCTCTCAACT-----TCTGAAAGATTAGTGCTG-TGATGG--TGAATCTAGGTCCCTCTGAC-T--GAAGG 657  
 Kangaroo Rat --GG-----GCCCCAGGC-CCTCAGAATCCAAGATGGAGTGTATAGG-CGGGGCTCTGGAACAGCTCAGAGCT-TGATGG--TGGAGTCCAGACTCTTGAACCT--GAAGG 706  
 Guinea Pig --TG-----CC-----C-CCTCCAAATGGAAGATGGCGGGGAGGGGGCGGAGTTCAGAGTATAGTCGGAGCTA-TGATGG--TGGAGGTAGCTCTTTGAGCT--GAAGG 661  
 Rabbit --GG-----GGCCTTCGCGCTCAGAGTCAAGATGGCGAGGGGGG-CGGGCTCCAGGCGAGTGGGAGCT-TGATGG--TGAAG-CCAGCTCTTTGAGT--GAAGG 675  
 Pika --GG-----GCTCTTCGCTCAGAAATCCAAGATGGCGAGTGGG-CAGGTTTCCAGGCGAGTGGGATG-T-----TGAAG-ACAACACTTCT-- 655  
 Human --GG-----GCCCTTCCCCTCCGAAATCCAAGATGGTGGGGGGGGGGGGCTTCCAGGCGAATCCGAGCTT-CAATGG--TGAAGTCCAGGCTCTTTGAGCT--GAAGG 674  
 Macaque --GG-----GCCCTTCCCCTCCGCA-TCCAAGATGGCGAGGGGGG-CGGGTTTCCATGCGATCAGAGCTT-CAATGG--TGAAGTCCAGTATTTGAGCT--GAAGG 672  
 Tarsier --GG-----ACCCCTGCCACTCCGAAATCCAAGATGGTGGGAGGGG-CGGGCGACCGGGCCGACCGCGCTG-CAATGG--TGAAGCGCCGGACTTTGAGCT--GAAGG 665  
 European Hedgehog --GG-----GCTCTTGTCCCTCAGAAATCCAAGATGGCGGGTGGGA-CGGTGTCCAGCCGAGCGAACTA-CAATGG--TGAAGGGCCGCTCTT-GAATA--GAAGG 671  
 Eurasian Shrew --GG-----GCTCTGGGGCGCTCCGCGTCCAAGATGGCGGGCGGAGGGGGGTTCCGGTCCGAGCGCCGCTG-TGATGG--CGAGACTCAGGCTCCACGGC-G-GATGG 673  
 Dog --GG-----GGCCCTTACCCTCCGCA-TCCAAGATGGCGAGAGGGG-CGGGTTTCCGGGCAAGCAAGCTG-CGATGG--TGAAGCCCAAGGCTTTGAGCT--GAAGG 670  
 Cat --GG-----GGTGTGATGGGGCCCTTACCCTCCGGA-TCCAAGATGGAGTAT-GGGG-CGGGTTTCCAGGCAAGCAAGCTG-TGATGG--TGAAGCCCAAGGCTTTGAGCT--GAAGG 676  
 Flying Fox --GG-----GTCTGTACCCTCTGGAATCCAAGATGGCGAGGGGG-CGGGTTTCCGGGCAAGGGAAGCTG-CGATGG--TGAAGTCCAGGCTTTGAGCT--GAAGG 664  
 Horse --GG-----GGCTTACCCTCTGGAATCCAAGATGGCGAGGGGG-CGGGTTTCCGGGCTAAGCTAAGCTG-TGATGG--TGAAGCCCAAGGCTTTGAGCT--GAAGG 673  
 Cow --GG-----GCCCTTACCCTCCGGAATCCAAGATGGCGAGGGGG-CGGGCTTCCGGGCAAGCAAGCTG-CGATGG--TGAAGCCCAAGGCTTTGAGCT--GAAGG 673  
 Armadillo --GG-----GCCGTTCCCTCCCGGA-TCCAAGATGGCGAGAGGGG-CGTGCTTCCGCTCCACCCGAGCTT-CAATGG--TGTACTCGGGCTCTGAGCT--GAAGG 670  
 Elephant --GG-----ACCCCTGCTCTCAGAAATCCAAGATGGCAGAGGGGG-TGGGTTCCGGAACAATGAAGCAG-CGATGG--TGGCTCAGGCTTCTTATGCT--GAAGG 683  
 Hyrax --GG-----GAATCCAAGATGGCAGAGGGGG-----GAATCCAAGATGGCAGAGGGGG-----GAATCCAAGATGGCAGAGGGGG-----TGAAGTCCAGGAGGAGGGGGTTGGGGAACAATAGGAG 709  
 Opossum -TCAGCTTCAAAGAGCCCTGAGGAGTCTCTTTCAAATCCCAACAATATTCTCTTCCCAAGTCCAGCTTGAATTC-AAGTGGCAGAGGAGGAGGGTTGGGGAACAATAGGAG 661  
 Platypus TTCGGTCTCAC-AATTCCTCTCCGATAGTTCAGATGGTGGATGGGG-AGGATCCAGGGGAAACAGAGCTGGAGATGG--TGGATACAGGACCACAGGCCA-GATGG 731

Mouse ACAGACTCAGCAGCCACTCAGGGCACT--CCTAG-TGATGGG-----GTGGCA-----GCTGCGGAGG---TGGCTGTAAACTCACCACCTACTCTTGG 743  
 Kangaroo Rat ACAGCCTCAGTAGCCACTCAGGGAGT--CCTCA-CGGTGGAG-----GTGG-TG-----GCTCGCCCTAC---TCACTTACCCTCGGACTTAGCAGCGGA 792  
 Guinea Pig ACAGCACCAGTAGCCACTCAGGGCCCA--CCTGG-TTGTAT-TG-----GCGGTT-----GCTCAGCCACT---TTCCTCTGTTTAACCTCAAAGCGAG 746  
 Rabbit ACATTTCAGTAGCCACTCAGGGAGCA--CCCGT-TGGTGGT-----CTGCG-----CCTTAGTCAAC---TTACCTCACACTTAAGCAGCCGAGCGCG 761  
 Pika -CAGTATCAGTGGCTCTCAGAGAGTA--CCTGG-TGGGGGTG-----CTGCT-----GCTCAGTATG---TTCTCTTACACTTCAAGTACCTGCCCAAG 740  
 Human ACAGCCTCAGTAGCCACTCAGGGAGCT--CATCG-TGGTGGT-----GTGGTGGC-----GCTCAAGCCACT---TTACCTCACACTTAAGCAGCCGAGGTGAC 763  
 Macaque ACAGCCTCAGTAGCCACTCAGGGAGCT--CTTGG-TGGTGGT-----GTGGTGGC-----ACTGACTCAAC---TTACCTCACACTTAAGCAGCCGAGGTGAC 761  
 Tarsier ACAGATTCAAGTAGCCACTCAGAGAGCT--CCTGG-TGGTGGT-----ATGGTGGTCA--GCTCAAGCCACT---TCACTCACACTTAAGCAGCCGAGGGCG 753  
 European Hedgehog ATGTTTTAGTAGCCACTCAGAGAGCTTCTCAC-CAGCACCAACACCAC-CACCACCCGAGTGTGGTATGGGCTGCTTCCGAGCC--TCAACCCATTAAGCAGCCAGGGCGG 788  
 Eurasian Shrew ACAGCCTCAGTAGCCACTCAGGGAGCT--CTGG-CGGTGGT-----GCGGGT-----CCGCTGCT---TCATTTCAAGCTTTCAGCAACCCAGGGCGAG 756  
 Dog ACAGCCTCAGTAGCCACTCAGGGAGCT--CCCGG-AGTGGGG-----GTGGCA-----GTGAGCGGCT---TCACTCAGCCTTCAAGCAGCCAGGCTG 756  
 Cat ACAGCCTCAGTAGCCACTCAGGGAGCT--CCTGG-AGTGGT-----GTGGCA-----CCTAGCCGCT---TCACTCAGCCTTTCAGCAACCCAGGGCGG 762  
 Flying Fox ACAGCCTCAGTAGCCACTCAGGGAGCT--CCTGG-CAGTGGT-----GTGGCA-----CTCAGCCACT---TTACCTCACACTTAAGCAGCCAGGGCGG 750  
 Horse ACGTTTTCAGTAGCCACTCAGGGAGCT--CCTGG-CGGTGGG-----GTGGGCT---CTCAGCCGCT---TTACCTCACACTTAAGCAGCCAGGGCGG 759  
 Armadillo ACAGCCTCAGTAGCCACTCAGGGAGCT--CCTGG-CGGTGGG-----GTGGGCT---CTCAGCCGCT---TTACCTCACACTTAAGCAGCCAGGGCGG 758  
 Elephant ATGGCTCAGTAGCCACTCAGGGAGCT--CCTGG-CGGTGG---GCGAGCTG---GAGCCGCC---TTACCTCACACTTAAGCAGCCAGGGCTG 754  
 Hyrax ACGCCTTAGTAGCCACTCAGGGAGCT--CCAA-TGTAGCA---CCGCGTGG---CTGCGCAGCT---TTCCTCGCTTAAAGTGAAGGGAGTCCAC 771  
 Hyrax ACGCTCAGTAGCCACTCAGGGAGCT--CCAA-TGTAGCA---CCGCGTGG---CTGCGCAGCT---TTCCTCGCTTAAAGTGAAGGGAGTCCAC 771  
 Opossum CTACGATTTGGTGCAGACTTGGTCCCT--CCAAAGTGTATGACAGCCAG-GTAAACACTCAAAGAGCGGCTTGGGCTGACACAC--TCATTTGGGCGAGTGGGCGATTATGCTG 822  
 Platypus GCACCTCTTAGGCCACTCAGAGGAGCGGGCGAGGCTGGCA.CCAGGAGGCCACTGAGTTGTCACTAGCGAAATGGTTCCACAGGCTATGGGCTATTTGGCTACTATACTCCCCACC 851

Mouse A-----CGTAAAGCACTGAGG-----CCCTTGGAG 768  
 Kangaroo Rat GCGAGCTTCAAAAAAATCTAGC-----CCTTAAAG 822  
 Guinea Pig G-----TTACAAATCCA-----TCTTGGTGG 768  
 Rabbit C-----TCTTGAATCCAT-----GTCCCGCAA 783  
 Pika T-----TCTTCAATCCAT-----CTCTCGAG 762  
 Human C-----TCAGGAATCGGT-----TCCCGCAG 785  
 Macaque C-----TCAGGAATCGGT-----TCCCGCAG 783  
 Tarsier C-----CCTCAGTCTGG-----CTCAGTGG 775  
 European Hedgehog T-----TTTTAGCATCCGGCTTT--CTCTCACTG 815  
 Eurasian Shrew C-----TCTCCATCCCT-----CTGTGGG 778  
 Dog C-----GCACAGATGGT-----CTCTCCAG 778  
 Cat C-----TCGCAAGTCCAA-----ATCTCGCAT 784  
 Flying Fox T-----TTACGAATCCCC-----CTCTCCAG 772  
 Horse C-----CCACGGAGCGT-----CTCTGGCAG 781  
 Cow -----TCACCAATCTGC-----CTCTCCAG 779  
 Armadillo C-----TCCGAAATCGT-----TCCCGTAG 775  
 Elephant C-----TTATGAATTTGG-----TCCCTGAG 794  
 Hyrax C-----TTCTGGATTTGG-----CCCTGAG 771  
 Opossum CATCGGAGCTTTGGGCTGGCCCTG-GCCTCAAGT 856  
 Platypus C-CTACTCCACCAGTTCAGAGAAATCCCAATGG 885
