# Supplementary material for: Dual hindlimb control elements in theTbx4gene and region-specific control of bone size in vertebrate limbs
Source: Oxford University Press journal article supplement (doi:10.1242/dev.017384), 2008-06-26
Supplement: dev017384-sup-017384-tables1-s3.pdf [file dev017384-sup-017384-tables1-s3.pdf]

**Table S1. Number of independent founders for each transgene**

| Transgene                 | Number of independent transgenic founders | Number of transgenics with staining pattern                                                                                     |
|---------------------------|-------------------------------------------|---------------------------------------------------------------------------------------------------------------------------------|
| RP24-376P4                | 2                                         | Hindlimbs: 2/2 (weak)<br>Lungs: 2/2<br>Genital tubercle: 2/2<br>Umbilical cord: 0/2                                             |
| RP24-84E15                | 4                                         | Hindlimbs: 4/4<br>Lungs: 4/4<br>Genital tubercle: 4/4<br>Umbilical cord: 4/4                                                    |
| RP23-136J3                | 3                                         | Hindlimbs: 3/3<br>Lungs: 3/3<br>Genital tubercle: 3/3<br>Umbilical cord: 3/3                                                    |
| ΔHLEA                     | 4                                         | Hindlimbs: 4/4 (note: posterior only)<br>Lungs: 4/4<br>Genital tubercle: 4/4<br>Umbilical cord: 4/4                             |
| ΔHLEB                     | 8                                         | Hindlimbs: 8/8 (note: reduced staining in distal half of autopod)<br>Lungs: 8/8<br>Genital tubercle: 8/8<br>Umbilical cord: 8/8 |
| ΔHLEA/ΔHLEB               | 5                                         | Hindlimbs: 1/5<br>Lungs: 5/5<br>Genital tubercle: 5/5<br>Umbilical cord: 5/5                                                    |
| pDBM2                     | 15                                        | Hindlimb: 14/15                                                                                                                 |
| pDBM3                     | 10                                        | Lung: 9/10                                                                                                                      |
| pDBM5                     | 6                                         | Hindlimb: 6/6<br>Genital tubercle: 6/6<br>Umbilical cord: 1/6                                                                   |
| pDBM7                     | 6                                         | Hindlimb: 5/6                                                                                                                   |
| pDBM36                    | 16                                        | Hindlimb: 15/16                                                                                                                 |
| pDBM46                    | 11                                        | Hindlimb: 8/11                                                                                                                  |
| pDBM40                    | 3                                         | Hindlimb: 3/3<br>Genital tubercle: 3/3<br>Umbilical cord: 3/3<br>Scattered cells in torso/face: 3/3 (note: ectopic pattern)     |
| pDBM42                    | 9                                         | No clear pattern (genital tubercle: 4/9)                                                                                        |
| pDBM43                    | 6                                         | No clear pattern (limbs: 2/6)                                                                                                   |
| pDBM44                    | 9                                         | No clear pattern                                                                                                                |
| pDBM45                    | 14                                        | Hindlimb: 10/14<br>Genital tubercle: 13/14<br>Umbilical cord: 6/14                                                              |
| pDBM50                    | 10                                        | Hindlimb: 7/10<br>Genital tubercle: 8/10<br>Umbilical cord: 2/10                                                                |
| pDBM51                    | 3                                         | Hindlimb: 0/3<br>Genital tubercle: 0/3<br>Umbilical cord: 0/3                                                                   |
| pDBM20 (stickleback HLEB) | 19                                        | Hindlimb: 17/19<br>Genital tubercle: 18/19                                                                                      |

**Table S2. Relative hindlimb bone size averages of wild-type, +/ $\Delta$ HLEA and  $\Delta$ HLEA/ $\Delta$ HLEA littermates**

| Measurement              | +/+ (n=14)       | +/ $\Delta$ HLEA (n=15) | $\Delta$ HLEA/ $\Delta$ HLEA (n=15) | WT-Het <i>P</i> -value        | WT- $\Delta$ HLEA <i>P</i> -value |
|--------------------------|------------------|-------------------------|-------------------------------------|-------------------------------|-----------------------------------|
| Patella length           | 1.0 $\pm$ 0.012  | 0.95 $\pm$ 0.0095       | 0.88 $\pm$ 0.012                    | 0.0018                        | 1.4 $\times$ 10 <sup>-07</sup>    |
| Femur length             | 1.0 $\pm$ 0.0044 | 0.98 $\pm$ 0.0044       | 0.96 $\pm$ 0.0049                   | 0.0040                        | 3.8 $\times$ 10 <sup>-06</sup>    |
| Tibia length             | 1.0 $\pm$ 0.0032 | 1.0 $\pm$ 0.0045        | 0.98 $\pm$ 0.0053                   | NS                            | 0.013                             |
| Tibia width              | 1.0 $\pm$ 0.012  | 0.93 $\pm$ 0.013        | 0.82 $\pm$ 0.0075                   | 9.4 $\times$ 10 <sup>-4</sup> | 5.5 $\times$ 10 <sup>-12</sup>    |
| Fibula length            | 1.0 $\pm$ 0.0031 | 1.0 $\pm$ 0.0041        | 0.98 $\pm$ 0.0060                   | NS                            | 0.030                             |
| Pelvis length            | 1.0 $\pm$ 0.0056 | 0.99 $\pm$ 0.0064       | 0.99 $\pm$ 0.0061                   | NS                            | NS                                |
| Pelvis width (anterior)  | 1.0 $\pm$ 0.0091 | 0.97 $\pm$ 0.0097       | 0.94 $\pm$ 0.012                    | 0.040                         | 2.7 $\times$ 10 <sup>-4</sup>     |
| Pelvis width (center)    | 1.0 $\pm$ 0.0067 | 0.98 $\pm$ 0.0067       | 0.96 $\pm$ 0.0085                   | 0.013                         | 0.0018                            |
| Pelvis width (posterior) | 1.0 $\pm$ 0.017  | 1.0 $\pm$ 0.017         | 1.1 $\pm$ 0.020                     | NS                            | 5.8 $\times$ 10 <sup>-4</sup>     |

Hindlimb bone sizes have been normalized relative to forelimb bone lengths and the normalized wild-type (WT) average for each hindlimb bone has been arbitrarily set to 1. The s.e.m. of each normalized average is indicated. The WT-Het and WT- $\Delta$ HLEA *P*-value columns refer to comparisons between +/+ and +/ $\Delta$ HLEA and between +/+ and  $\Delta$ HLEA/ $\Delta$ HLEA, respectively.

NS, not significant.

**Table S3. Average lengths of metatarsal and phalangeal elements of the first, third and fifth digit rays from wild-type and  $\Delta$ HLEA/ $\Delta$ HLEA littermates**

|                    |              | +/+ (n=14)       | $\Delta$ HLEA/ $\Delta$ HLEA (n=15) | WT- $\Delta$ HLEA P-value      |
|--------------------|--------------|------------------|-------------------------------------|--------------------------------|
| <b>Digit-ray 1</b> | Metatarsal 1 | 4.30 $\pm$ 0.033 | 4.07 $\pm$ 0.063                    | 0.0017                         |
|                    | Phalanx 1    | 2.14 $\pm$ 0.010 | 1.93 $\pm$ 0.020                    | 2.5 $\times$ 10 <sup>-09</sup> |
|                    | Phalanx 2    | 1.09 $\pm$ 0.032 | 0.96 $\pm$ 0.047                    | 2.9 $\times$ 10 <sup>-09</sup> |
| <b>Digit-ray 3</b> | Metatarsal 3 | 7.23 $\pm$ 0.034 | 6.93 $\pm$ 0.053                    | 5.5 $\times$ 10 <sup>-05</sup> |
|                    | Phalanx 1    | 2.98 $\pm$ 0.025 | 2.74 $\pm$ 0.023                    | 9.1 $\times$ 10 <sup>-08</sup> |
|                    | Phalanx 2    | 1.81 $\pm$ 0.014 | 1.69 $\pm$ 0.015                    | 2.3 $\times$ 10 <sup>-06</sup> |
|                    | Phalanx 3    | 1.50 $\pm$ 0.017 | 1.34 $\pm$ 0.014                    | 1.3 $\times$ 10 <sup>-07</sup> |
| <b>Digit-ray 5</b> | Metatarsal 5 | 6.42 $\pm$ 0.044 | 6.32 $\pm$ 0.046                    | NS                             |
|                    | Phalanx 1    | 2.55 $\pm$ 0.020 | 2.47 $\pm$ 0.019                    | 0.0029                         |
|                    | Phalanx 2    | 1.45 $\pm$ 0.014 | 1.41 $\pm$ 0.015                    | 0.032                          |
|                    | Phalanx 3    | 1.14 $\pm$ 0.013 | 1.04 $\pm$ 0.011                    | 5.5 $\times$ 10 <sup>-06</sup> |

Lengths are in millimeters. The s.e.m. of each average is indicated.

NS, not significant.
