# Supplementary figures and images for: Dual hindlimb control elements in theTbx4gene and region-specific control of bone size in vertebrate limbs
Source: Oxford University Press journal article supplement (doi:10.1242/dev.017384), 2008-06-26

**A**

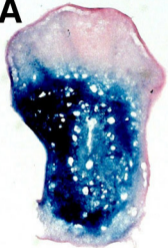

**pDBM7**

**B**

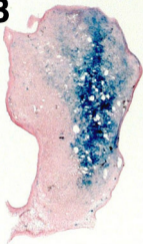

**pDBM40**

**C**

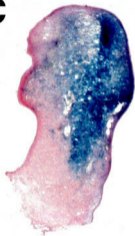

**pDBM45**

Supplement: dev017384-sup-017384-figs1.pdf [file dev017384-sup-017384-figs1.pdf]

Wild-type

$\Delta$ HLEA/ $\Delta$ HLEA

**A**

**B**

*Fgf8*

*Fgf8*

**C**

**D**

*Hand2*

*Hand2*

**E**

**F**

*Alx4*

*Alx4*

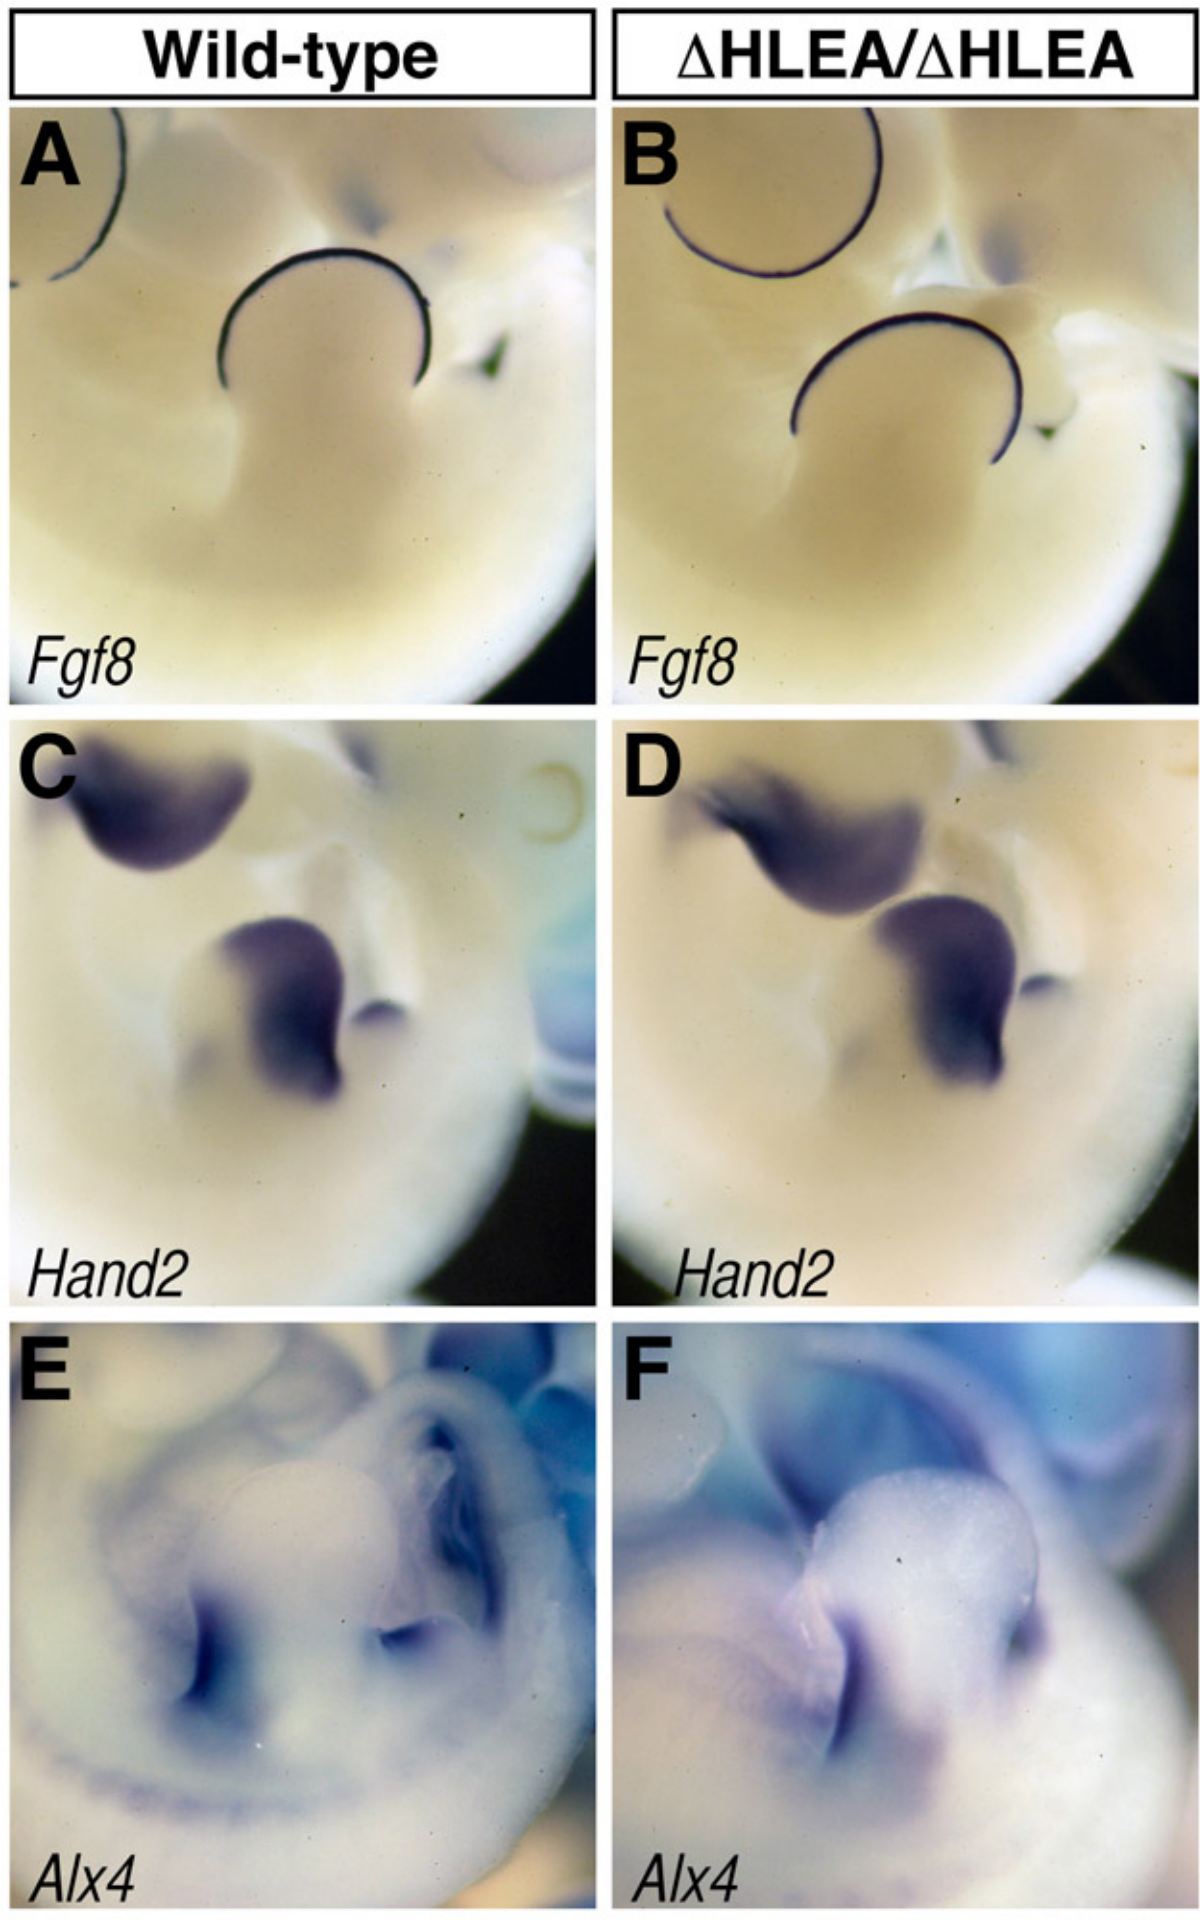

Supplement: dev017384-sup-017384-figs2.pdf [file dev017384-sup-017384-figs2.pdf]

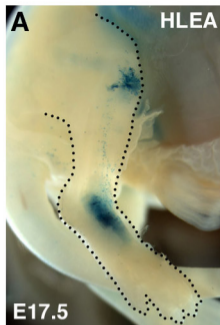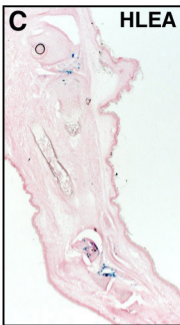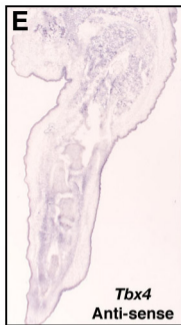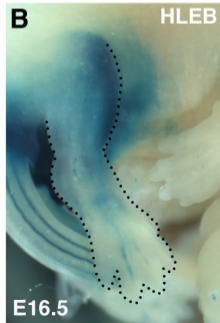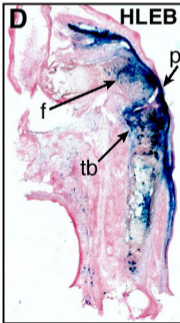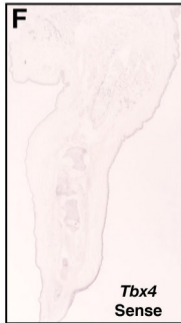

Supplement: dev017384-sup-017384-figs3.pdf [file dev017384-sup-017384-figs3.pdf]

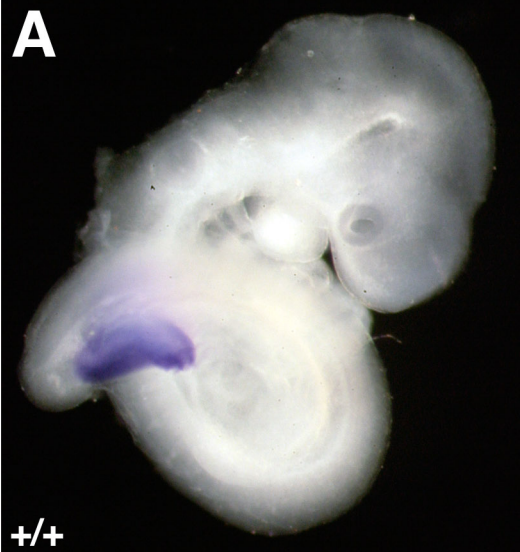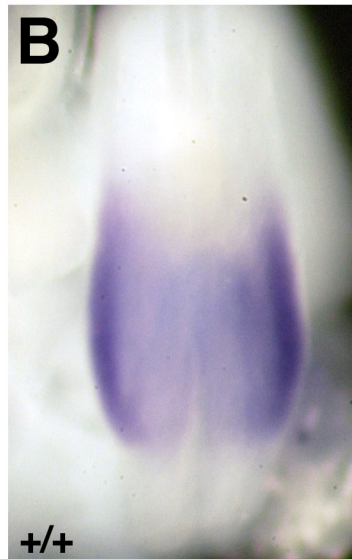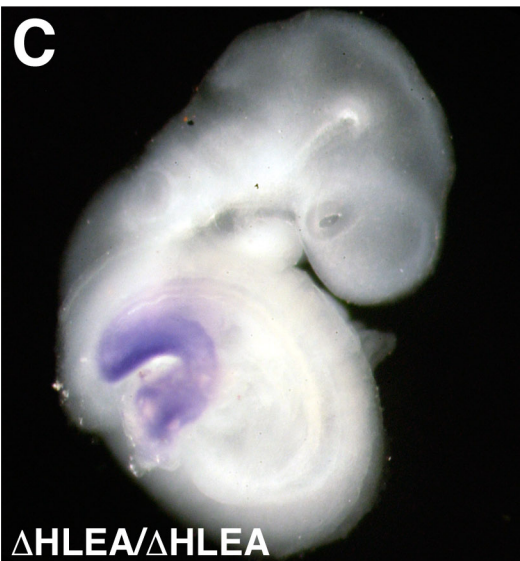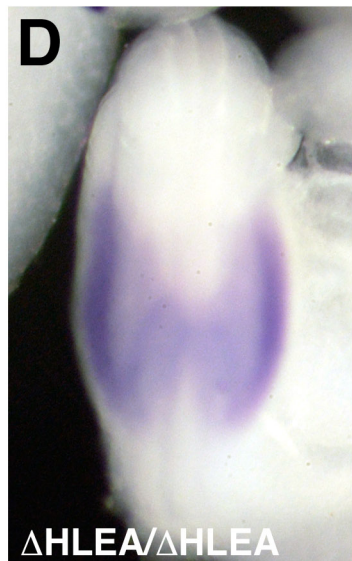

Supplement: dev017384-sup-017384-figs5.pdf [file dev017384-sup-017384-figs5.pdf]

**Wild-type**

**$\Delta$ HLEA/ $\Delta$ HLEA**

**A**

**B**

*Fgf8*

*Fgf8*

**C**

**D**

*Hand2*

*Hand2*

**E**

**F**

*Alx4*

*Alx4*

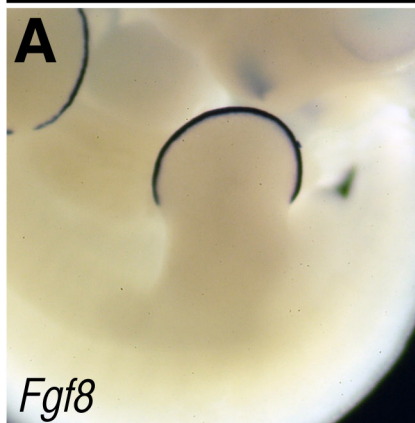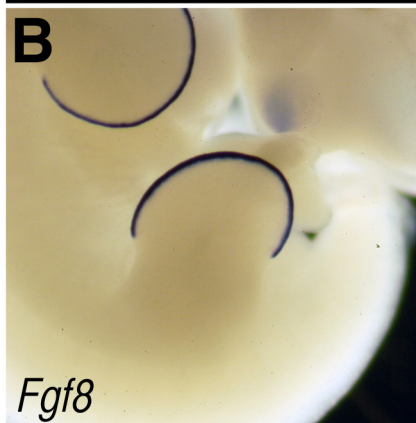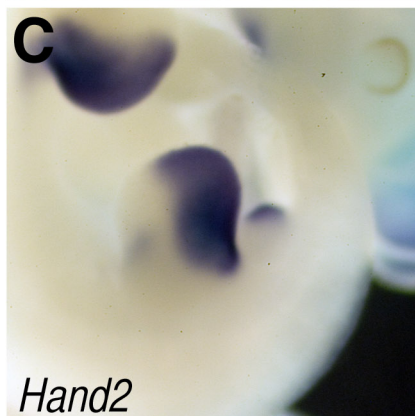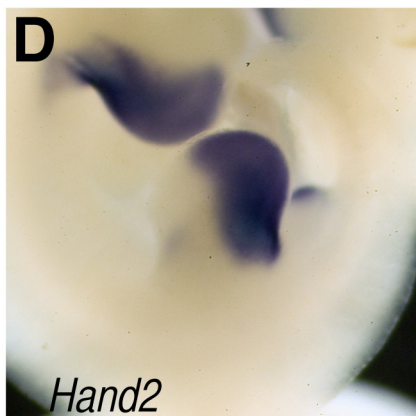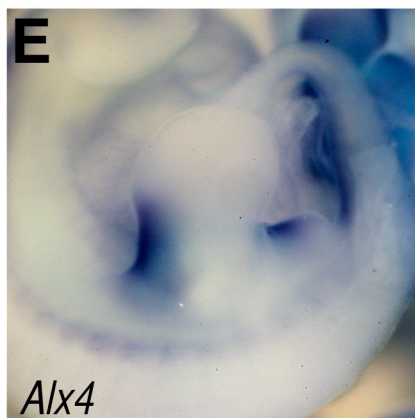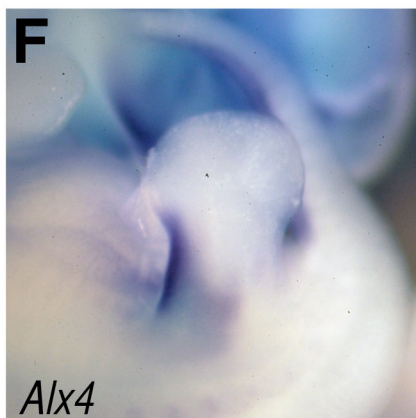

Supplement: dev017384-sup-017384-figs6.pdf [file dev017384-sup-017384-figs6.pdf]

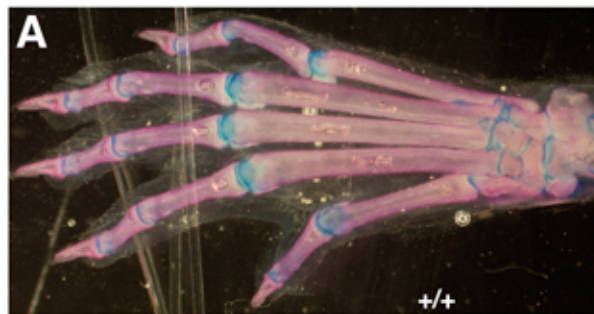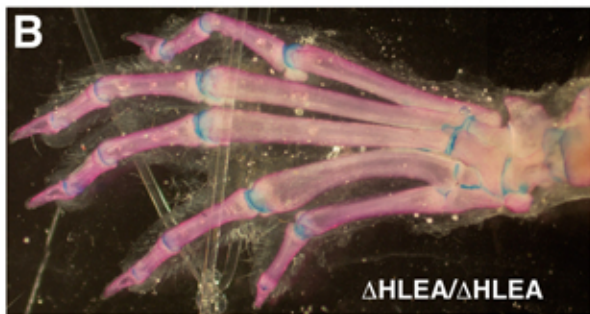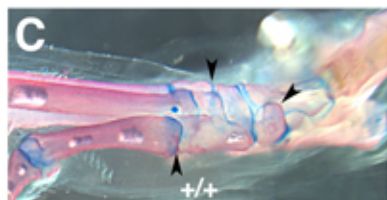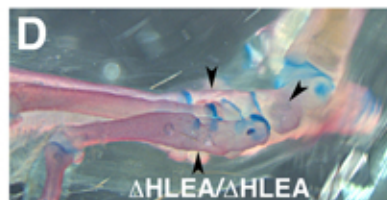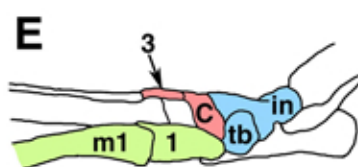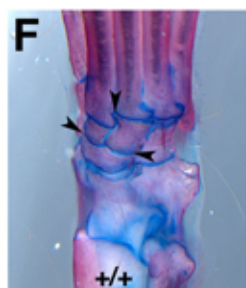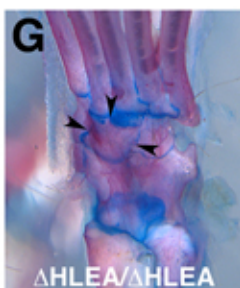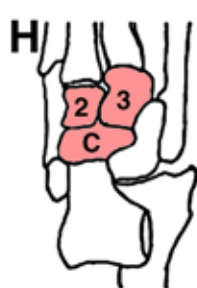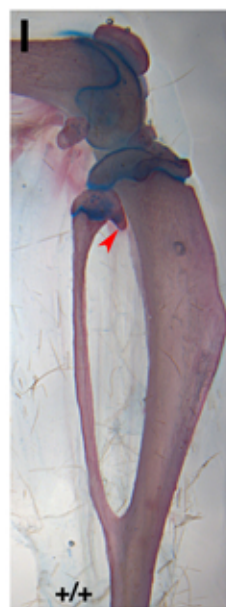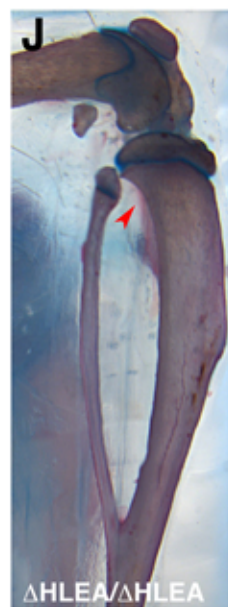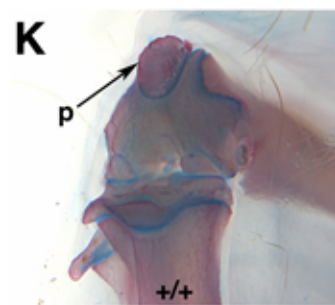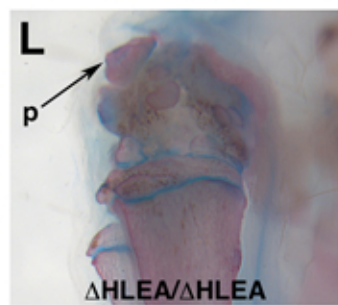

Supplement: dev017384-sup-017384-figs7.pdf [file dev017384-sup-017384-figs7.pdf]
